# Supplementary material
Source: publisher figshare collection journal article supplement (https://geolsoc.figshare.com/ndownloader/files/20199213)
Supplement: Supplementary file 1 [file 20199213]

Electronic supplementary material

**A workflow for the rapid assessment of the landslide-tsunami hazard in perialpine lakes**

Michael Strupler, Flavio S. Anselmetti, Michael Hilbe, Katrina Kremer, and Stefan Wiemer

## 1. Forecasted peak ground accelerations for Switzerland

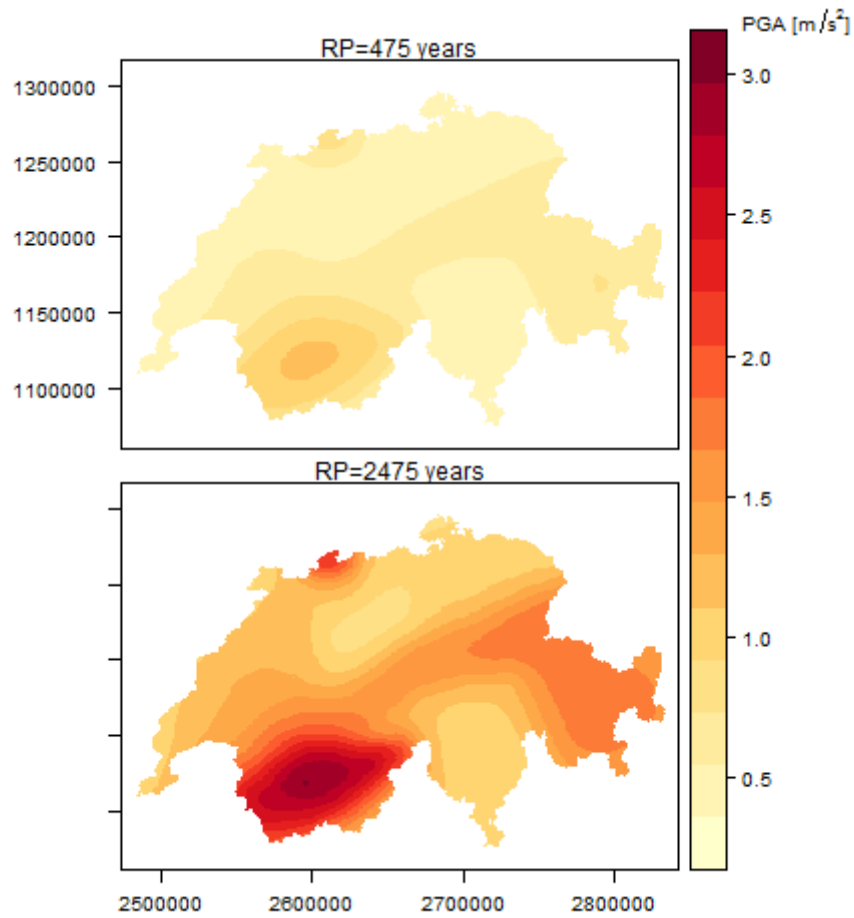

**Fig. ESM.1.** Interpolated median PGAs expected for mean return periods of 475 (top) and 2475 years (bottom) in Switzerland. PGA values are in  $\text{m/s}^2$ . Coordinate Reference System: CH1903+. Data from Wiemer et al. (2016)

## 2. Sedimentation model

$T_{PMS}(i,j)$  is calculated as function of its water depth and slope gradient with the following linear regression (Equation ESM.1; Strupler et al. 2018):

$$T_{PMS}(i,j) = \sum_{unit=SMU3}^{unit=SMU4} unit\ age\ interval\ [yr] \times 0.01 \times (a(i,j)) + b \times wd(i,j) - c \times \alpha(i,j) \quad (1)$$

For the Holocene drape in Lake Zurich, two different units (termed “SMU3” and “SMU4” in Strupler et al. (2018b)) with different sedimentation rates can be identified: a stratigraphically lower/older lying Holocene sedimentary unit that spans ~ 5000 years and an upper/younger Holocene unit that spans ~7000 years (Strasser 2008; Strupler et al. 2018). The potentially mobile sediment results from the summation of the two unit thicknesses at each pixel (i,j). Used coefficients are shown in Table ESM.1.

**Table ESM.1.** *Coefficients used in Equation ESM.1*

| Unit | Age interval (years) | a     | b        | c        |
|------|----------------------|-------|----------|----------|
| SMU3 | 5000                 | 0.047 | 0.000175 | 0.001305 |
| SMU4 | 7000                 | 0.021 | 0.000104 | 0.000654 |

### 3. Lake Lucerne

#### Comparison of $T_{PMS}$ (this study) to measured Holocene thickness (Strasser et al. 2007)

Holocene sedimentation rates (i.e. < 11500 cal yr B.P.) at three slope locations in Lake Lucerne are ~22 cm/ka (Weggis site), ~36 cm/ka (St.Niklausen site), and ~42 cm/ka (Chrütztrichter site), which would correspond to a drape thickness of ~2.5, ~4., and ~4.8 m at their investigated sites (Strasser et al. 2007). In comparison, the potentially mobile sediment modelled with the approach of Strupler et al. (2018b) does not show a systematic over- or underestimation. However, there are differences between ~20 and ~50 %.

**Table ESM.2.** Location, measured and modelled Holocene drape of long cores from Strasser et al. (2007) that show an undisturbed Holocene sediment drape. Water depth (WD) and slope were sampled from the bathymetry based on the core location. Core coordinates from Strasser (2008) with Coordinate Reference System CH1903 were converted to CH 1903+.  $T_{Strasser2007}$  = measured thickness by Strasser et al. (2007),  $T_{PMS}$  = Thickness of the potentially mobile sediment calculated in this study.

| Core Name | X       | Y       | WD   | Slope | $T_{Strasser2007}$ | $T_{PMS}$ | Diff. [%] |
|-----------|---------|---------|------|-------|--------------------|-----------|-----------|
| 4WS05-K1  | 2668474 | 1208744 | 35.2 | 6.1   | 2.5                | 3.7       | 48        |
| 4WS05-K4  | 2672225 | 1209150 | 57.2 | 14.6  | 4.1                | 3.1       | -24       |
| 4WS05-K6  | 2675025 | 1208983 | 32.2 | 5.2   | 4.8                | 3.8       | -21       |

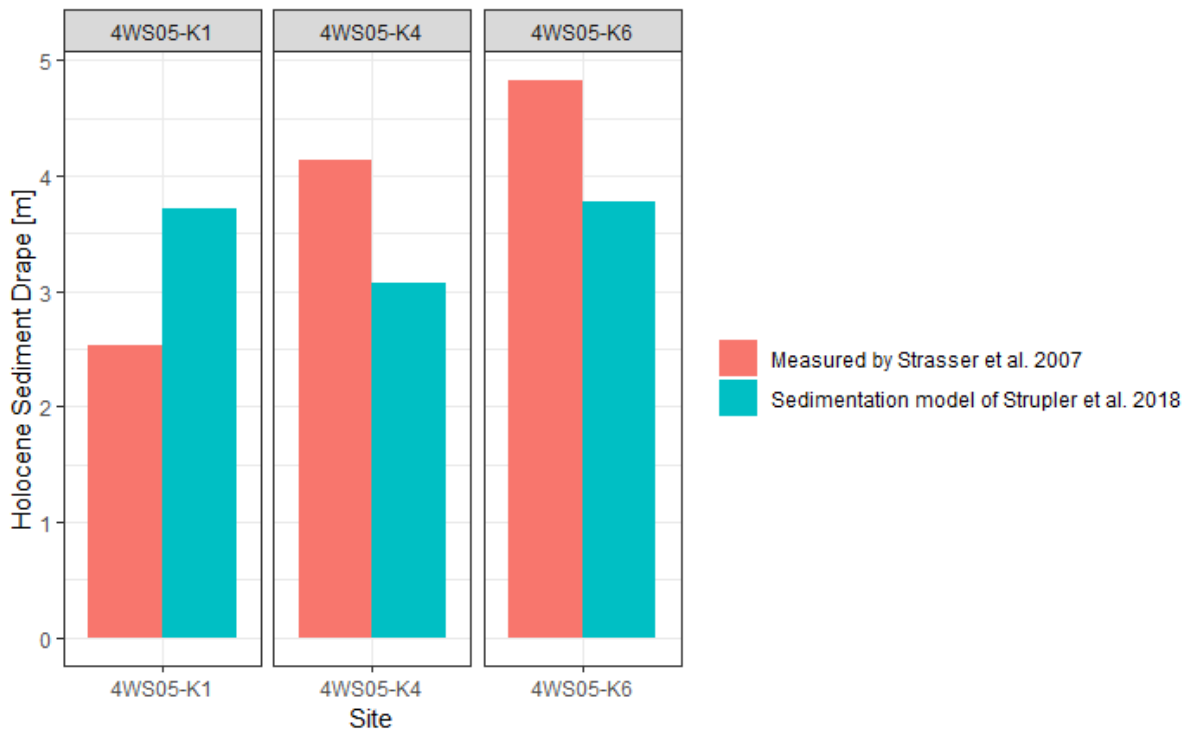

**Fig. ESM.2.** Comparison of  $T_{PMS}$  to measured Holocene thickness from Strasser et al. (2007)

## Plots of landslide volumes

(a)

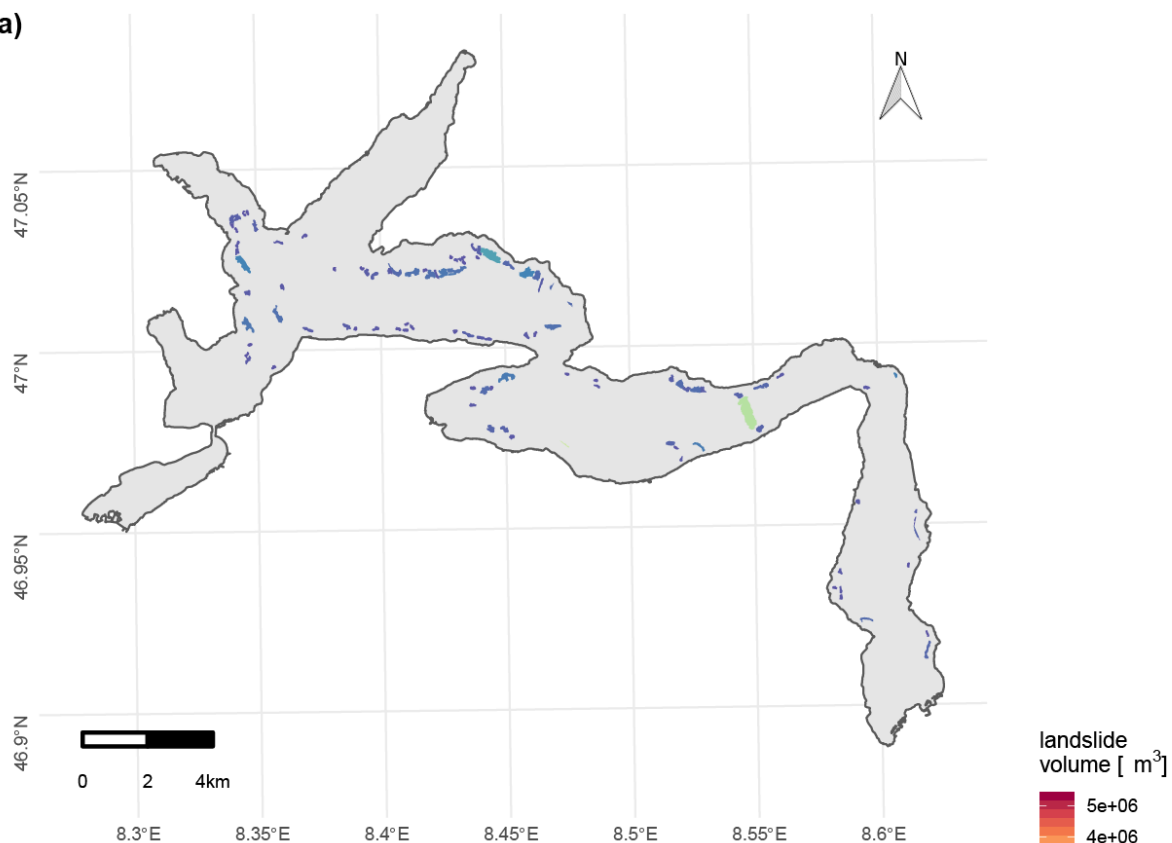

(b)

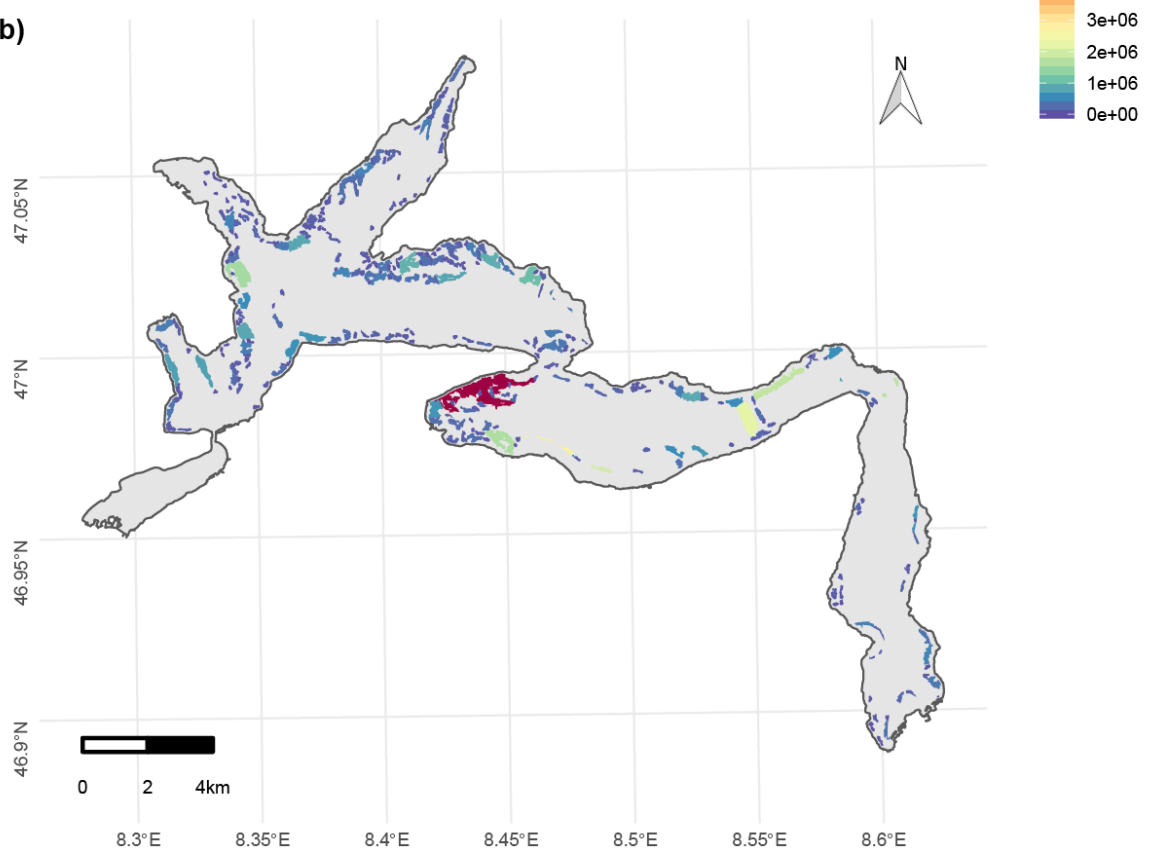

**Fig. ESM.3.** Potential landslides in Lake Lucerne for a mean RP of 475 (a) and 2475 years (b)

## 4. Lake Zug

### Bathymetry

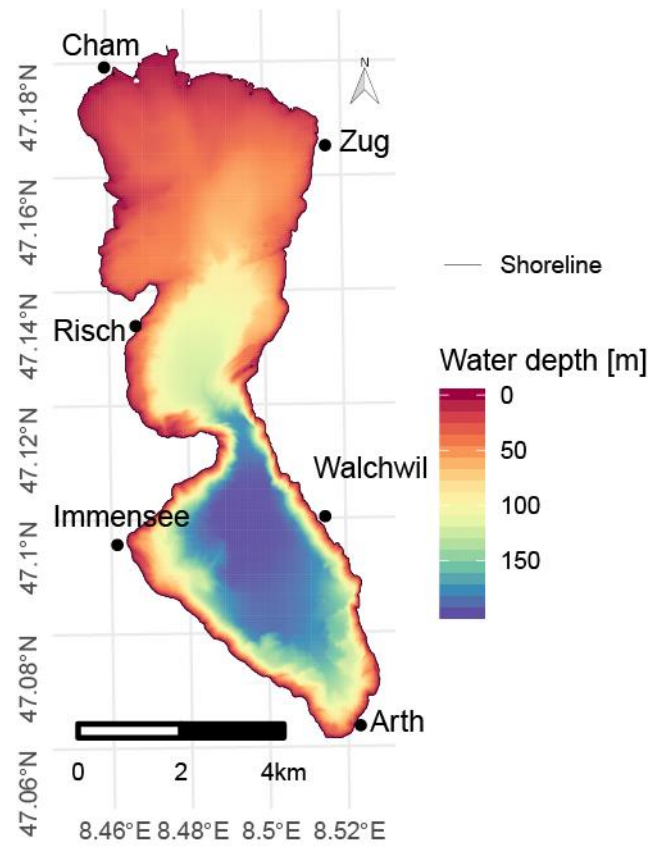

**Fig. ESM.4.** Bathymetry of Lake Zug

## Landslide characteristics

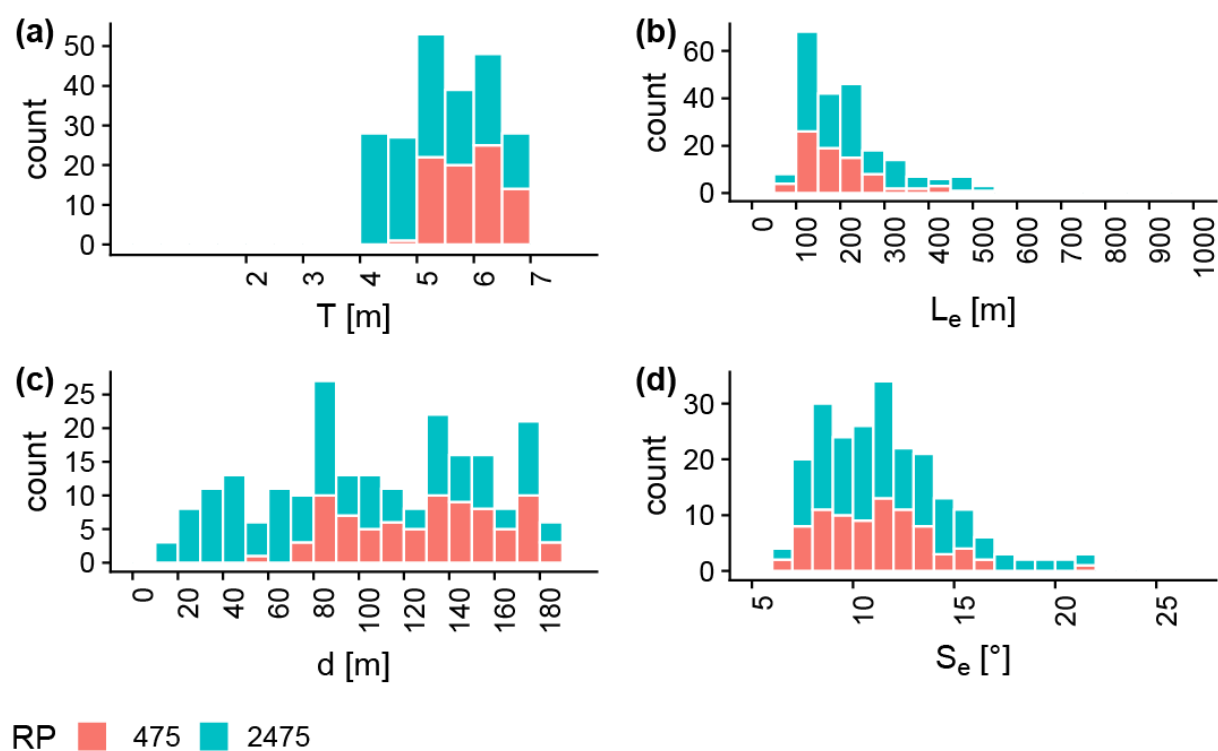

**Fig. ESM.5.** Characteristics of potential landslides forecasted for Lake Zug for RP=475 (red) and 2475 years (cyan).

## Location of forecasted landslides and $\eta_{0,2D}$

(a)

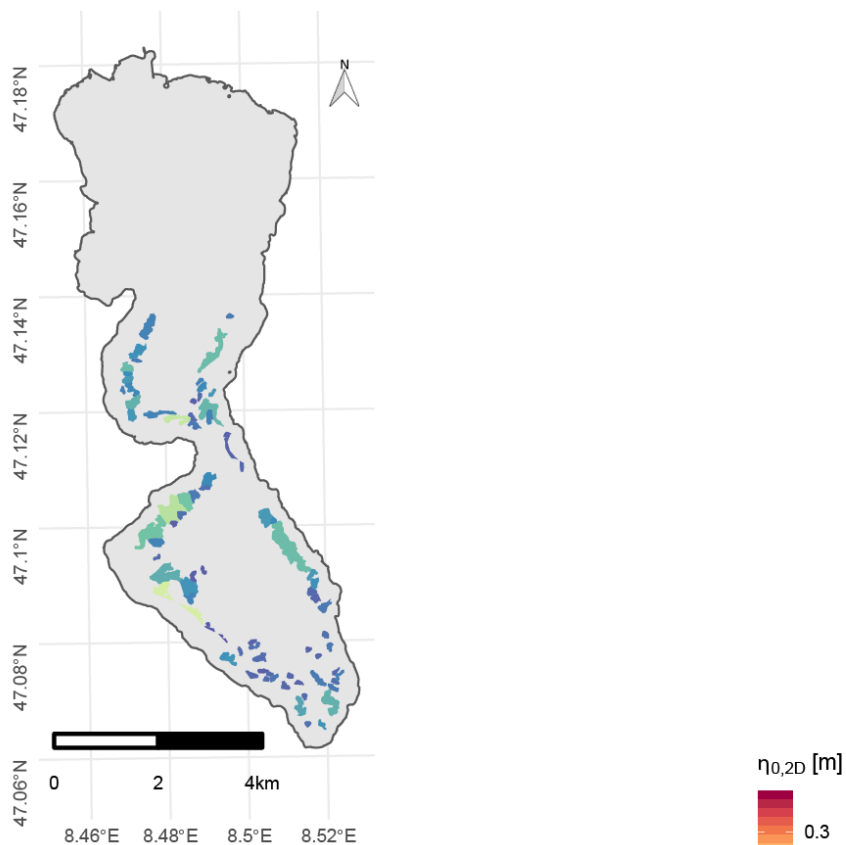

(b)

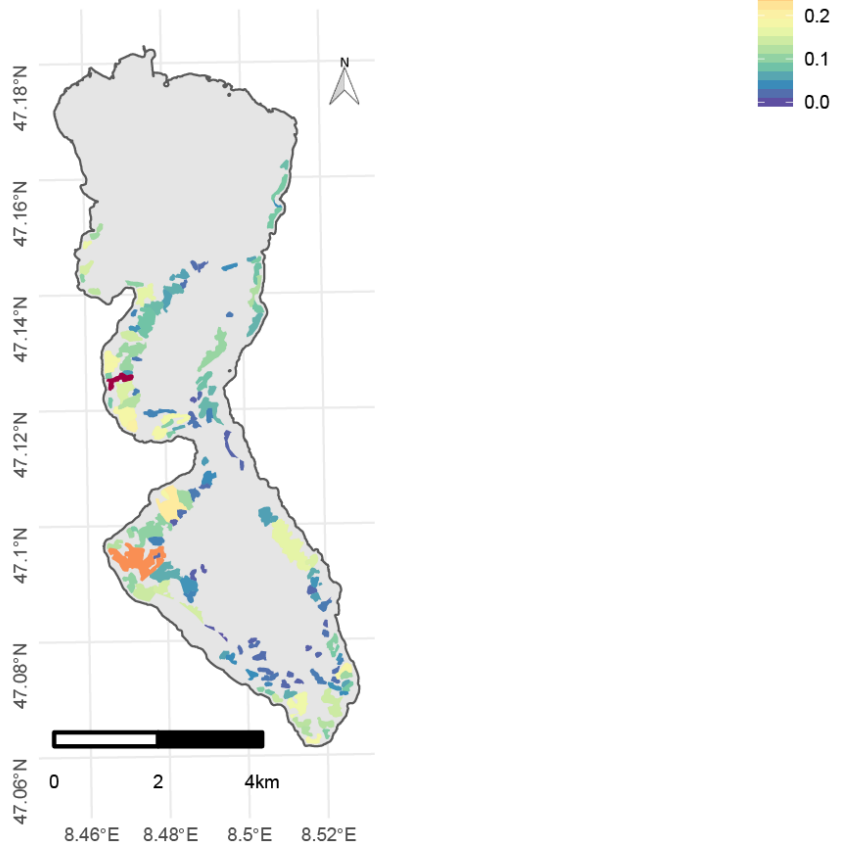

**Fig. ESM.6.** Location of forecasted landslides and characteristic tsunami amplitudes in Lake Zug for PGAs with RP=475 (a) and 2475 years (b)



## 5. Lake Walensee

### Bathymetry

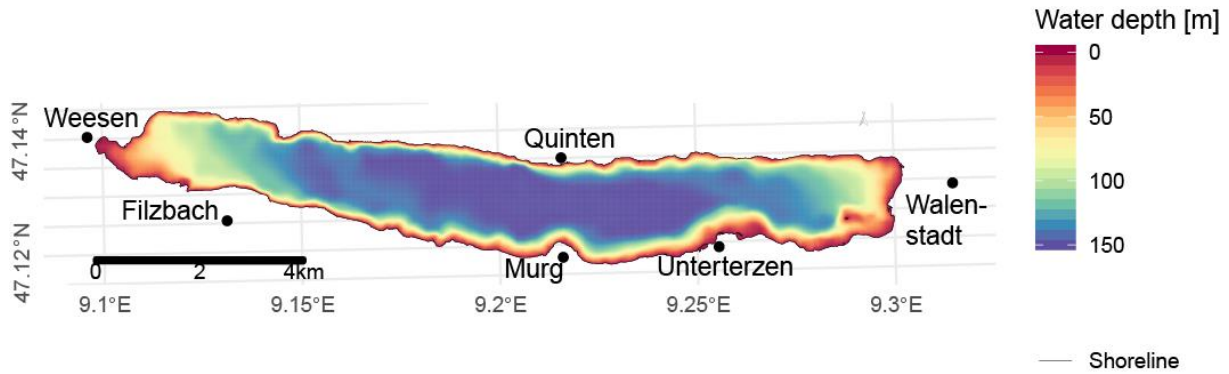

**Fig. ESM.7.** Bathymetry of Lake Walensee

### Landslide characteristics

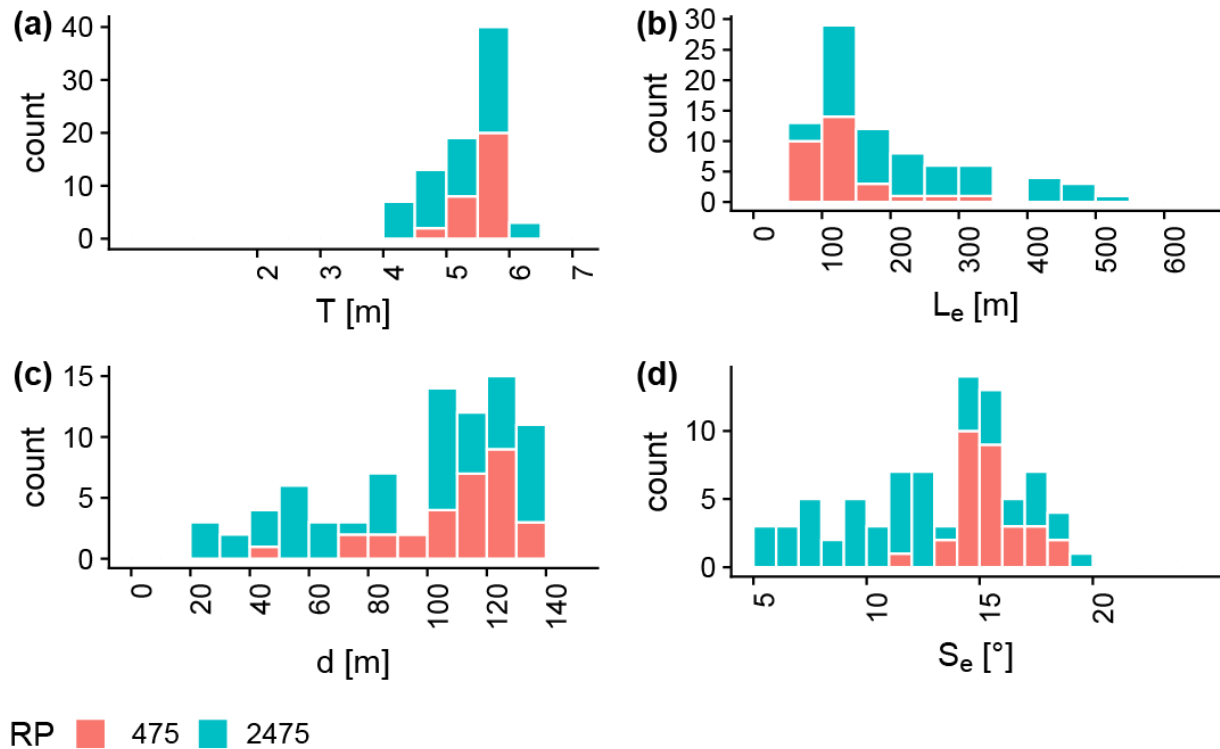

**Fig. ESM.8.** Characteristics of potential landslides forecasted for Lake Walensee for RP=475 (red) and 2475 years (cyan).

# Location of forecasted landslides and $\eta_{0,2D}$

(a)

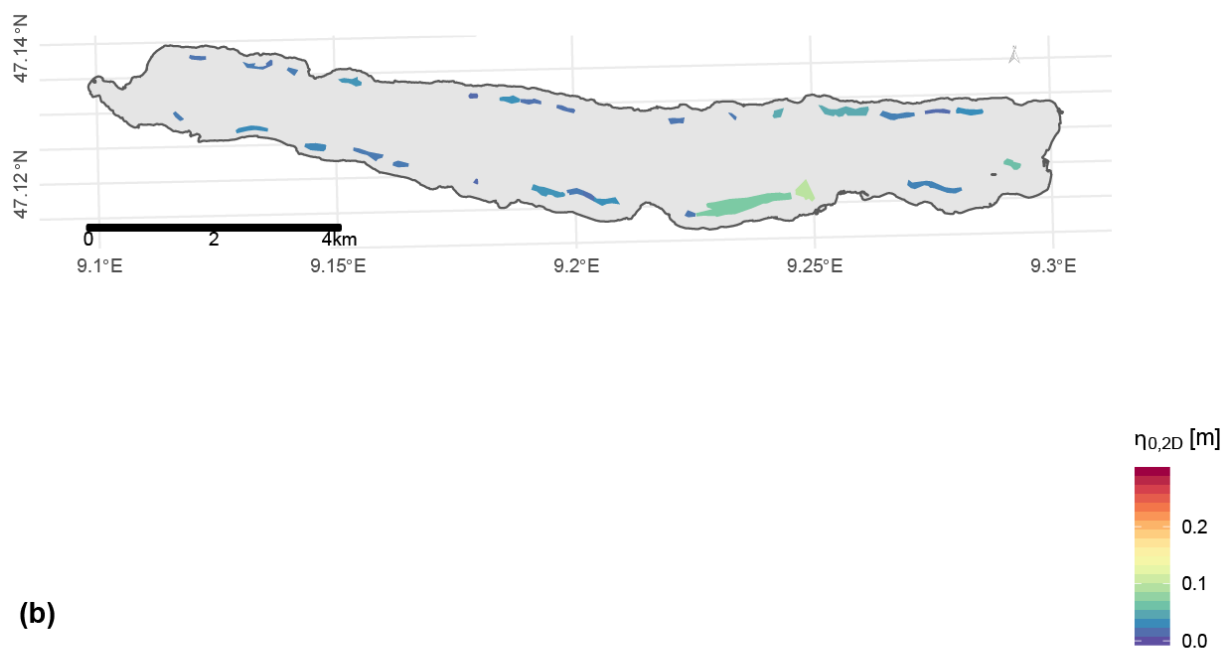

(b)

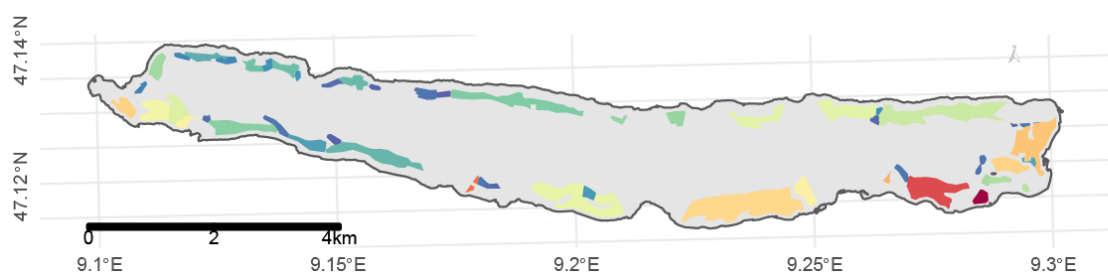

**Fig. ESM.9.** Location of forecasted landslides and characteristic tsunami amplitudes in Lake Walensee for PGAs with RP=475 (a) and 2475 years (b).

## 6. List of used R Libraries

**Table ESM.3.** *R libraries used in the workflow*

| <b>Library</b> | <b>Reference</b>         |
|----------------|--------------------------|
| cowplot        | Wilke 2019               |
| ggpubr         | Kassambara 2019          |
| ggrepel        | Slowikowski 2019         |
| ggsn           | Santos Baquero 2019      |
| knitr          | Xie 2019                 |
| lwgeom         | Pebesma 2019b            |
| pracma         | Borchers 2019            |
| raster         | Hijmans 2019             |
| RColorBrewer   | Neuwirth 2014            |
| rgdal          | Bivand et al. 2019       |
| rgeos          | Bivand and Rundel 2019   |
| rmapshaper     | Teucher and Russell 2018 |
| RPyGeo         | Brenning et al. 2018     |
| scales         | Wickham 2018             |
| sf             | Pebesma 2019a            |
| Smoothr        | Strimas-Mackey 2018      |
| stringr        | Wickham 2019             |
| tidyverse      | Wickham 2017             |
| units          | Pebesma et al. 2019      |

## 7. References

- Bivand R, Keitt T, Rowlingson B (2019) Rgdal: Bindings for the 'geospatial' data abstraction library
- Bivand R, Rundel C (2019) Rgeos: Interface to geometry engine - open source ('geos')
- Borchers HW (2019) Pracma: Practical numerical math functions
- Brenning A, Polakowski F, Becker M (2018) RPyGeo: ArcGIS geoprocessing via python
- Hijmans RJ (2019) Raster: Geographic data analysis and modeling
- Kassambara A (2019) Ggpubr: 'Ggplot2' based publication ready plots
- Neuwirth E (2014) RColorBrewer: ColorBrewer palettes
- Pebesma E (2019a) Sf: Simple features for r
- Pebesma E (2019b) Lwgeom: Bindings to selected 'liblwgeom' functions for simple features
- Pebesma E, Mailund T, Kalinowski T (2019) Units: Measurement units for r vectors
- Santos Baquero O (2019) Ggsn: North symbols and scale bars for maps created with 'ggplot2' or 'ggmap'
- Slowikowski K (2019) Ggrepel: Automatically position non-overlapping text labels with 'ggplot2'
- Strasser M (2008) Quantifying Late Quaternary Natural Hazards in Swiss Lakes - Subaquatic Landslides, Slope Stability Assessments , Paleoseismic Reconstructions and Lake Outbursts. ETH Zurich; Schweizerische Geotechnische Kommission, Dissertation ETH Zurich
- Strasser M, Stegmann S, Bussmann F et al (2007) Quantifying subaqueous slope stability during seismic shaking: Lake Lucerne as model for ocean margins. Marine Geology 240:77–97. doi: 10.1016/j.margeo.2007.02.016
- Strimas-Mackey M (2018) Smoothr: Smooth and tidy spatial features
- Strupler M, Danciu L, Hilbe M et al (2018) A subaqueous hazard map for earthquake-triggered landslides in Lake Zurich, Switzerland. Natural Hazards 90:51–78. doi: 10.1007/s11069-017-3032-y
- Teucher A, Russell K (2018) Rmapshaper: Client for 'mapshaper' for 'geospatial' operations
- Wickham H (2017) Tidyverse: Easily install and load the 'tidyverse'
- Wickham H (2019) Stringr: Simple, consistent wrappers for common string operations
- Wickham H (2018) Scales: Scale functions for visualization

Wiemer S, Danciu L, Edwards B et al (2016) Seismic Hazard Model 2015 for Switzerland. Swiss Seismological Service (SED) at ETH Zurich. 1–163. doi: 10.12686/a2

Wilke CO (2019) Cowplot: Streamlined plot theme and plot annotations for 'ggplot2'

Xie Y (2019) Knitr: A general-purpose package for dynamic report generation in r
